# Supplementary material for: Key Variables Screening of Near-Infrared Models for Simultaneous Determination of Quality Parameters in Traditional Chinese Food “Fuzhu”
Source: Hindawi journal article supplement (doi:10.1155/2018/3136516), 2018-01-01
Supplement: f1 [file 3136516.f1.csv]

41.43	41.85256659	40.92	41.55558156
40.75	40.66897185	41.52	41.32784307
41.01	41.35824971	42.12	42.34315526
41.03	41.70240433	42.72	42.55876113
41.23	41.53984504	42.98	43.30729637
41.59	41.14789467	43.49	43.27188712
41.88	41.65543516	43.63	43.22380668
42.06	42.09798858	43.88	44.05967521
42.24	42.56152756	44.02	43.37693099
42.42	43.63001102	44.07	44.55997185
42.67	42.47578032	44.14	43.35579031
42.78	43.51567164	44.44	45.6501407
42.9	42.87771375	44.58	45.00394385
42.94	43.09393251	44.85	45.08951021
43.37	43.02760626	45.03	45.7750765
43.38	42.70247812	45.27	45.61314306
43.4	43.30191624	45.43	45.95961144
43.49	43.83560623	45.57	45.14498862
43.53	43.94969041	45.81	45.63508171
43.58	43.26464558	46.12	46.22533043
43.67	43.37728876	46.26	45.22801667
43.77	45.02557517	46.5	45.8203647
43.82	44.36059776	46.68	48.57126385
43.91	44.53287168	46.77	46.48652583
43.97	43.12217925	46.97	48.51326078
43.97	44.18929689	47.18	47.19278192
44.03	43.73751542	47.3	47.96800855
44.04	44.18791386	47.42	47.76727612
44.06	43.98201275	47.62	48.07130421
44.1	44.94008762	47.72	48.59681742
46.12	46.53563513	47.81	47.88932519
44.13	44.31522803	48	48.18710345
44.22	44.50576567	48.17	48.1885249
44.34	44.81366997	48.24	48.14485945
44.35	45.10548271	48.4	48.14324719
44.53	44.66648918	48.49	48.02002806
44.53	44.47718612	48.58	48.47028915
44.58	44.86426885	48.63	48.05119814
44.69	44.13163892	48.78	48.30373236
44.73	46.43443124	48.9	48.68576239
44.79	44.60157346	49.03	48.30324074
44.85	44.90166159	49.09	48.26553564
44.92	44.42568908	49.19	49.05754494
44.98	45.1892981	49.49	47.87679642
45.09	44.60932351
45.15	43.95176209
45.17	46.59871554
45.31	46.41634015
45.4	45.14981451
45.42	44.63165563
45.51	44.98188505
45.53	44.92495485
45.56	45.3107998
45.66	47.10723554
45.78	45.46760731
45.78	45.85181972
45.83	46.57268392
45.87	45.23611419
46.11	45.64566371
46.16	46.5021037
46.16	46.81492668
46.21	46.20311682
46.37	46.09478901
46.41	45.85376127
46.47	47.91333995
46.6	48.28340881
46.63	48.15971798
46.64	46.20112597
46.72	45.69250958
46.73	47.05750037
46.77	48.13407304
46.83	46.56245078
46.87	48.57177417
46.88	46.18054822
47.06	47.93698753
47.06	47.28203625
47.13	47.11683232
47.22	48.24152751
47.27	47.55736517
47.28	46.96074221
47.34	47.90878573
47.35	48.262261
47.41	47.39550944
47.45	46.7073587
47.49	47.79959767
47.6	48.60826181
47.65	47.79190783
47.65	47.16470043
47.66	47.56504135
47.72	47.1430337
47.72	47.63434905
47.73	47.85711869
47.91	47.60927468
47.96	46.56805047
47.99	47.75333724
48.01	47.70827595
48.06	46.62137677
48.08	48.52359974
48.19	48.01850051
48.19	48.13315171
48.21	49.1114292
48.27	48.54614927
48.28	47.81970166
48.38	48.90783366
48.45	47.72985494
48.45	47.88364924
48.47	47.32214681
48.54	48.63231036
48.54	48.16021216
48.56	48.33748723
48.6	48.24449117
48.62	48.80045304
48.63	48.32119532
48.65	47.67967439
48.73	47.73583057
48.74	48.7173392
48.8	49.35828634
48.85	48.80328707
48.88	48.09350681
48.9	48.42375979
48.9	48.87567093
48.92	48.28970878
49.04	48.82030452
49.06	48.22887607
49.08	48.92526703
49.13	49.11622115
49.13	49.27142121
49.16	48.71186704
49.3	49.28953727
49.36	48.72224124
49.42	48.11313842
49.52	49.16385992
49.67	48.45971247
49.78	48.52060028
40.64	40.9018794
50.15	49.11729792
